# Supplementary material for: Estrogen deficiency heterogeneously affects tissue specific stem cells in mice
Source: PubMed Central journal article supplement (PMC4526849; doi:10.1038/srep12861), 2015-08-06

## Estrogen deficiency heterogeneously affects tissue specific stem cells in mice

Yuriko Kitajima, Hanako Doi, Yusuke Ono, Yoshishige Urata, Shinji Goto, Michio Kitajima, Kiyonori Miura, Tao-Sheng Li, Hideaki Masuzaki

### Supplementary Figure.

**A)** The mRNA expression of ER $\beta$  in c-kit<sup>+</sup> hematopoietic stem/progenitor cells and the matured c-kit<sup>-</sup> mononuclear cells from bone marrow.

**B)** The mRNA expressions of ER $\alpha$  and ER $\beta$  in the satellite cells after 3 days culture in growth medium and differentiated medium.

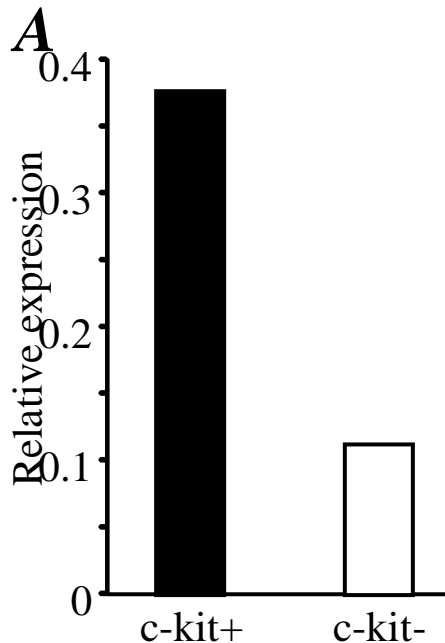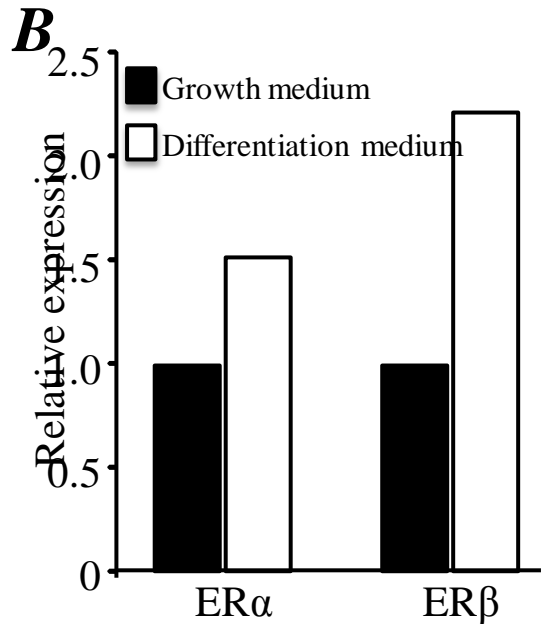

Supplement: srep12861-s1.pdf [file srep12861-s1.pdf]
